# Supplementary material for: Multi-cavity carbon nanofiber film decorated with Co-Nx doped CNTs for lithium–sulfur batteries with high-areal-capacity
Source: Royal Society of Chemistry journal article supplement (doi:10.1039/d2ta02844a), 2022-01-01
Supplement: d2ta02844a1.pdf [file d2ta02844a1.pdf]

## Supporting Information

# Multi-Cavity Carbon Fiber Film Decorated with Co-N<sub>x</sub> Doped CNTs for Lithium-Sulfur Batteries with High-Areal-Capacity

Xiao-Fei Yu, Bin He, Wen-Cui Li, Tao Wu, Xin-Rong Chen and An-Hui Lu\*

State Key Laboratory of Fine Chemicals, School of Chemical Engineering, Dalian University of  
Technology, Dalian 116024, P. R. China

E-mail: anhuilu@dlut.edu.cn; Tel/Fax: +86-411-84986112

### I. Supporting Experimental Details

**Visualized adsorption experiment:** Li<sub>2</sub>S<sub>6</sub> solution was synthesized by mixing sulfur and lithium sulfides (Li<sub>2</sub>S) at a molar ratio of 5:1 in 1,3-dioxolane (DOL)/1,2-dimethoxyethane (DME) (v:v = 1:1). Co-NCNTs@CNF-0.42 and CP with the same mass were added to 2 mL of Li<sub>2</sub>S<sub>6</sub> solution (1 mmol L<sup>-1</sup>), respectively.

**Li<sub>2</sub>S nucleation test:** Li<sub>2</sub>S<sub>8</sub> solution (0.2 mol L<sup>-1</sup>) was prepared by mixing sulfur and Li<sub>2</sub>S at a molar ratio of 7:1 with 1.0 mol L<sup>-1</sup> LiTFSI in diglyme for 48 h. Then, 25 μL of Li<sub>2</sub>S<sub>8</sub> catholyte was dropped onto the Co-NCNTs@CNF-0.42 or CP cathode, and 25 μL of blank electrolyte was dropped onto the lithium anode. For Co-NCNTs@CNF-0.42/CP cathode, the cells were discharged to 2.12 / 2.09 V under a galvanostatic current of 0.112 mA and then kept at 2.10 / 2.07 V until the current dropped to below 10<sup>-5</sup> A.

## II. Supporting Figures

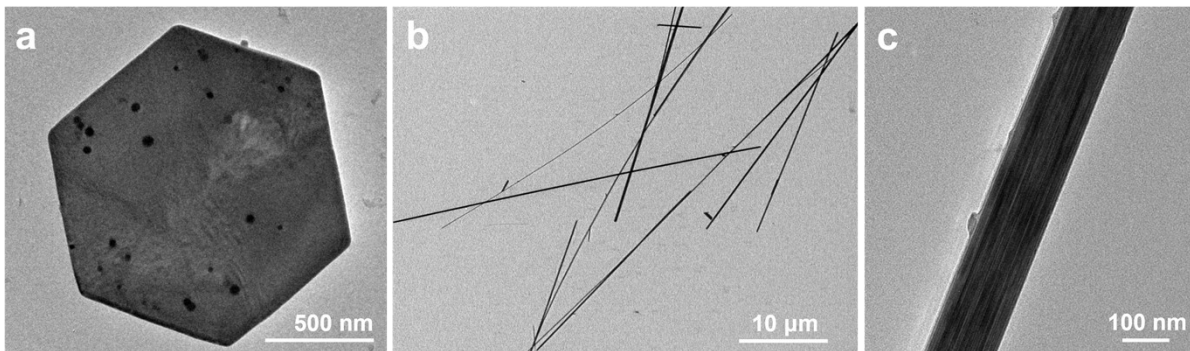

**Fig. S1** TEM images of (a) Co-Al LDH and (b-c) MnO<sub>2</sub> nanowires.

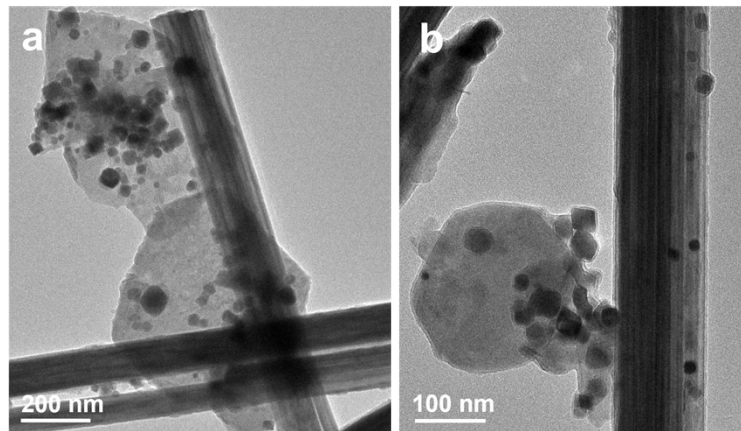

**Fig. S2** TEM images of MnO<sub>2</sub>@Co-Al LDH film.

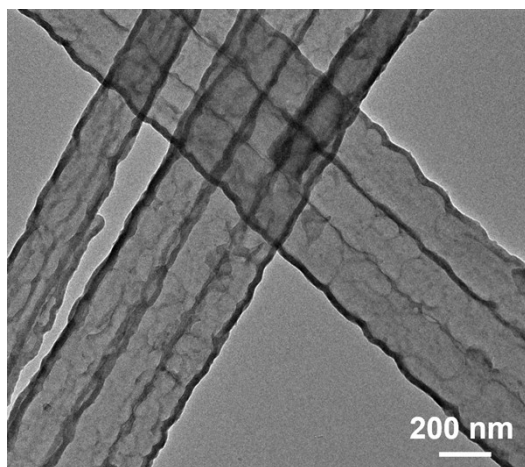

**Fig. S3** TEM image of CNF.

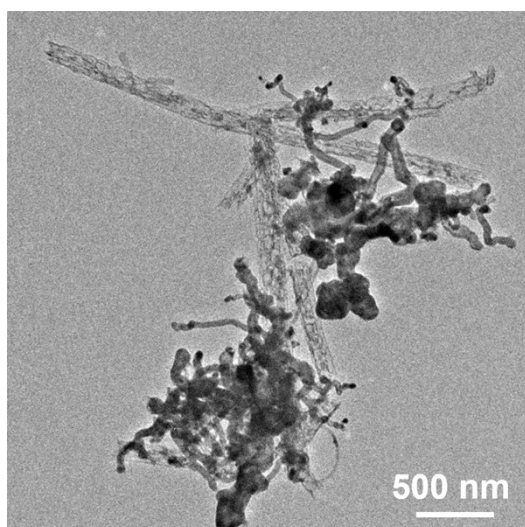

**Fig. S4** TEM image of Co-NCNTs@CNF-0.84.

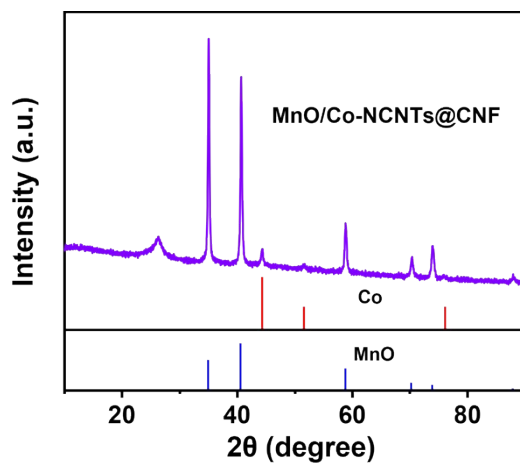

Fig. S5 XRD pattern of MnO/Co-NCNTs@CNF.

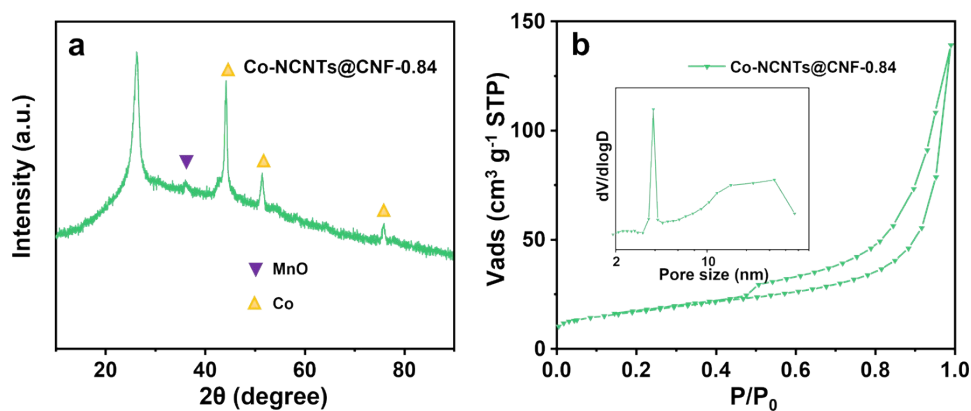

Fig. S6 (a) XRD pattern and (b) N<sub>2</sub> sorption isotherm and pore size distribution of Co-NCNTs@CNF-0.84.

Table S1 Pore structure parameters of Co-NCNTs@CNF-x and CNF.

| Samples           | $S_{\text{BET}}$           | $S_{\text{micro}}$ | $V_{\text{total}}$          | $V_{\text{micro}}$ | $V_{\text{meso}}/V_{\text{total}}$ |
|-------------------|----------------------------|--------------------|-----------------------------|--------------------|------------------------------------|
|                   | $\text{m}^2 \text{g}^{-1}$ |                    | $\text{cm}^3 \text{g}^{-1}$ |                    | %                                  |
| CNF               | 57.8                       | 29.3               | 0.18                        | 0.015              | 91.67                              |
| Co-NCNTs@CNF-0.21 | 49.8                       | 21.9               | 0.15                        | 0.010              | 93.33                              |
| Co-NCNTs@CNF-0.42 | 42.4                       | 12.3               | 0.19                        | 0.006              | 96.84                              |
| Co-NCNTs@CNF-0.84 | 59.6                       | 6.1                | 0.21                        | 0.003              | 98.57                              |

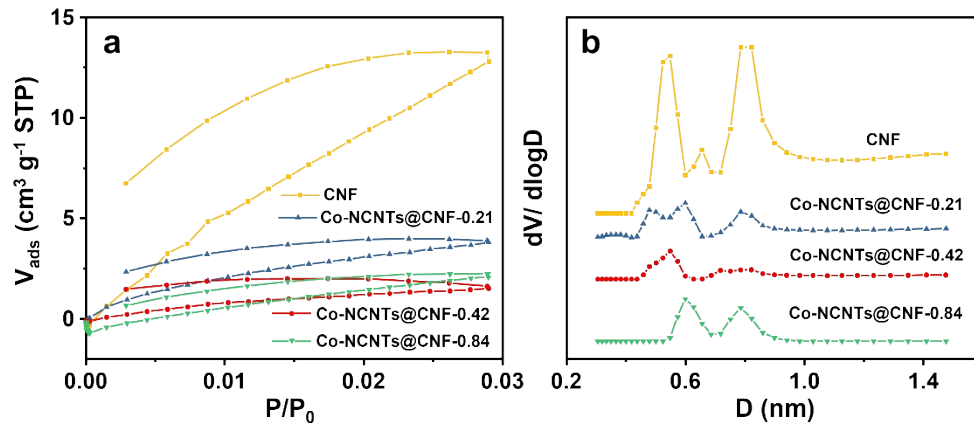

**Fig. S7** (a) CO<sub>2</sub> adsorption isotherms at 273 K and (b) corresponding micropore size distributions of Co-NCNTs@CNF-x and CNF.

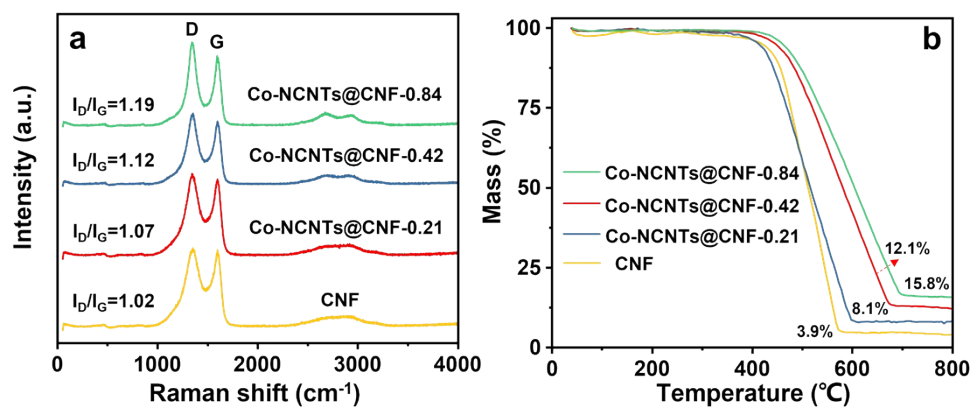

**Fig. S8** (a) Raman spectra and (b) TG curves in airflow of Co-NCNTs@CNF-x and CNF.

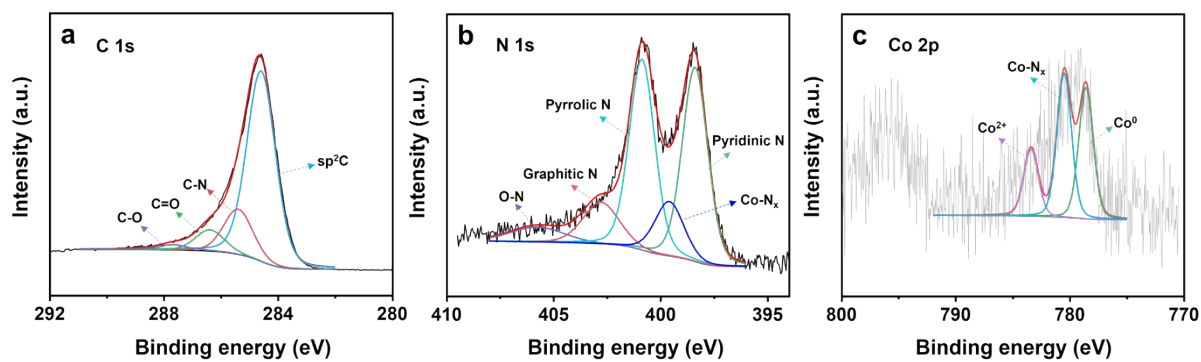

Fig. S9 (a) C 1s, (b) N 1s, and (c) Co 2p XPS spectra of Co-NCNTs@CNF-0.42.

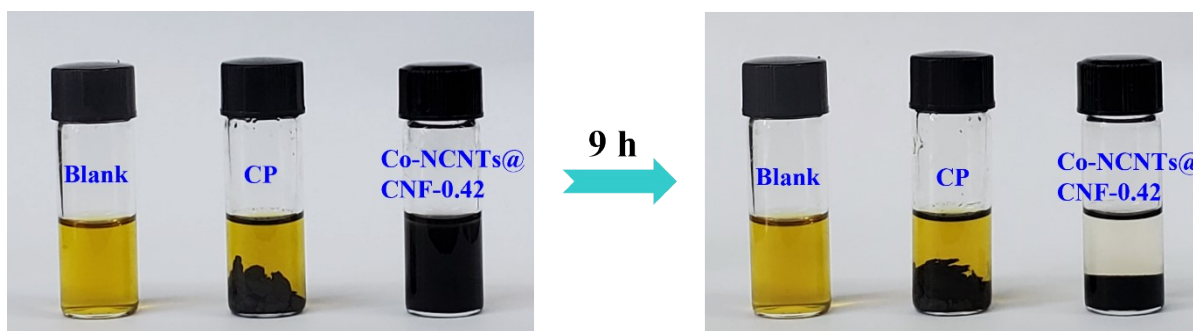

Fig. S10 Digital photographs of an adsorption experiment between Li<sub>2</sub>S<sub>6</sub> and Co-NCNTs@CNF-0.42 or CP.

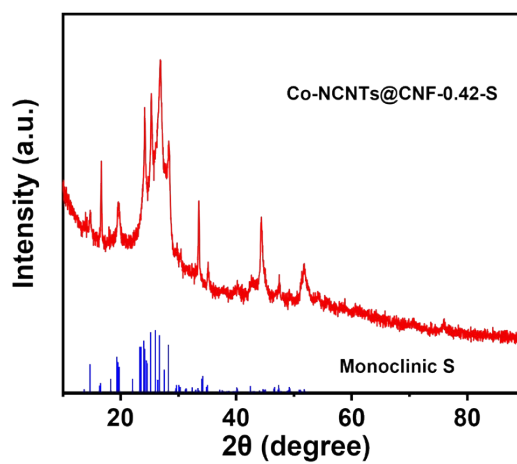

Fig. S11 XRD pattern of Co-NCNTs@CNF-0.42-S.

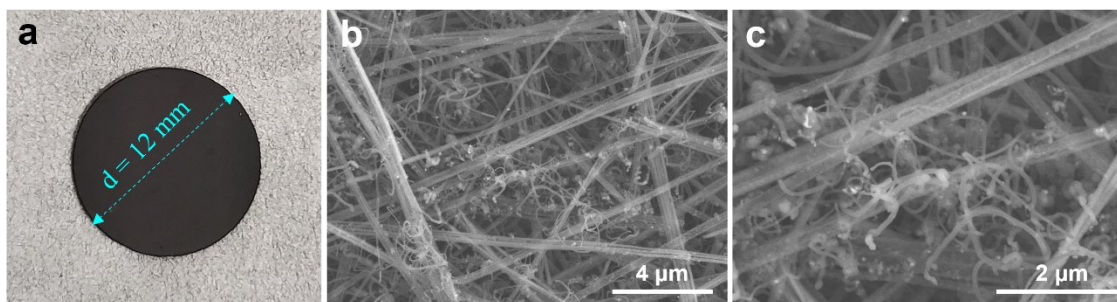

**Fig. S12** (a) Macroscopic picture and (b, c) SEM images of Co-NCNTs@CNF-0.42-S.

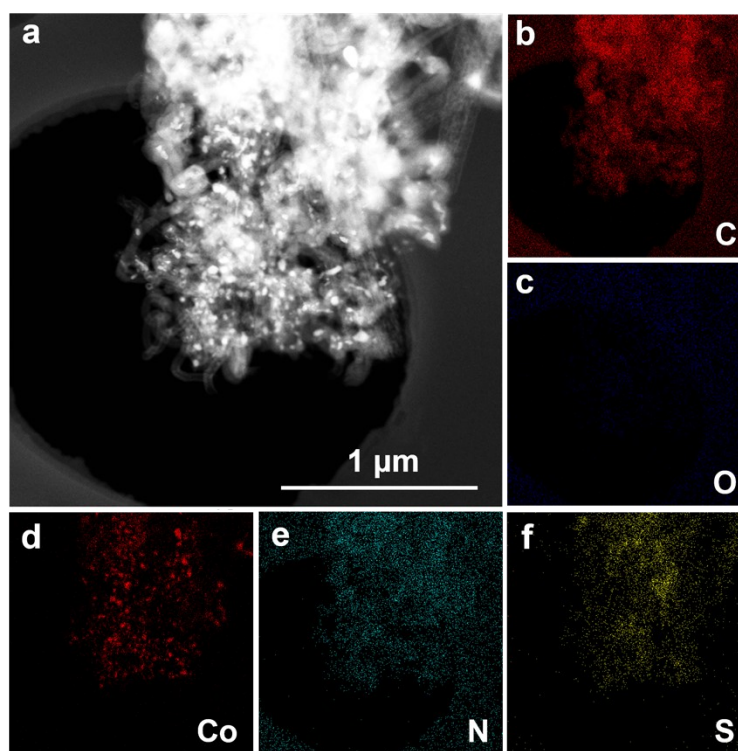

**Fig. S13** (a) STEM image of Co-NCNTs@CNF-0.42-S and corresponding elemental mappings for (b) C, (c) O, (d) Co, (e) N, and (f) S.

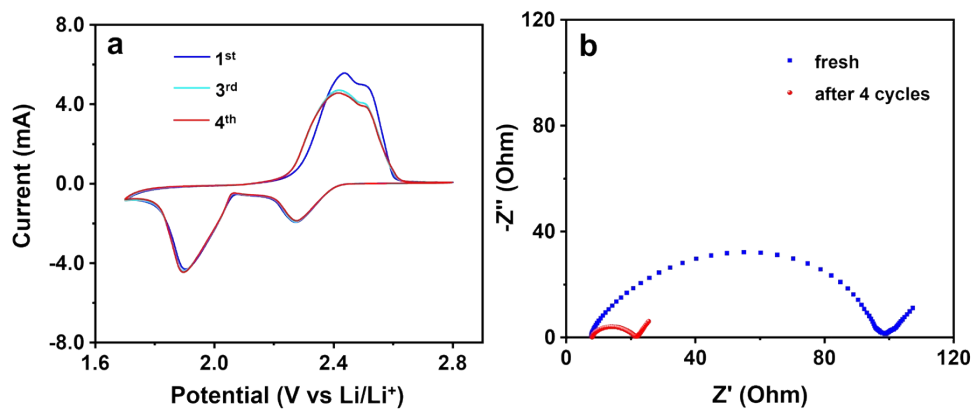

Fig. S14 (a) CV curves at 0.1 mV s<sup>-1</sup> and (b) Nyquist plots of CP-S electrodes.

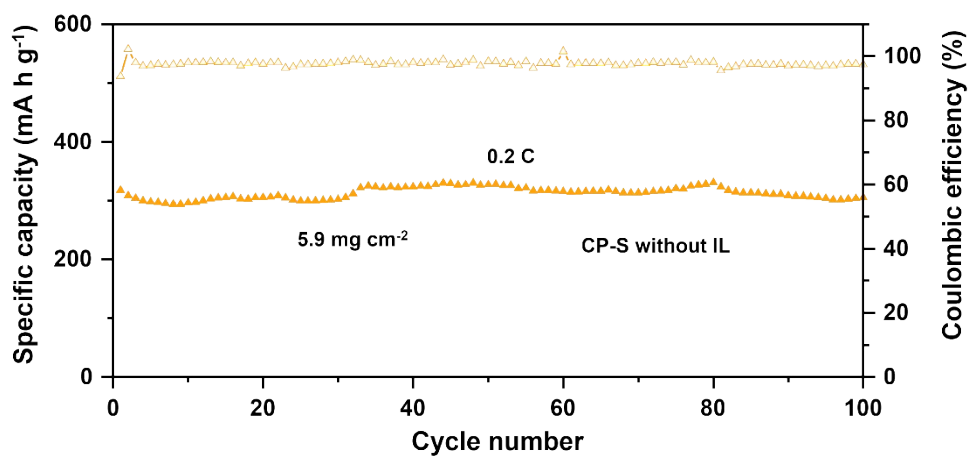

Fig. S15 Cycling performance of CP-S electrode without an IL at 0.2 C.



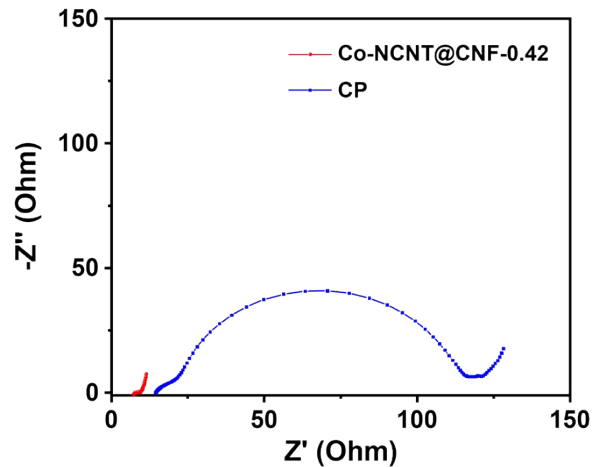

**Fig. S16** Nyquist plots of Co-NCNTs@CNF-0.42 and CP symmetric batteries.

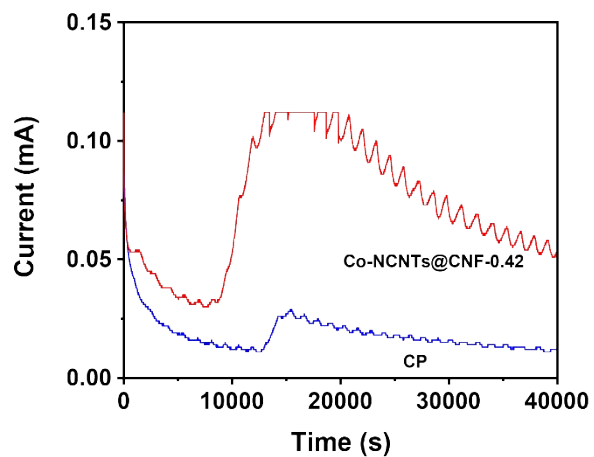

**Fig. S17** Potentiostatic discharging curves of  $\text{Li}_2\text{S}_8$ /diglyme solution at 2.10 / 2.07 V on the surfaces of Co-NCNTs@CNF-0.42 and CP electrodes.

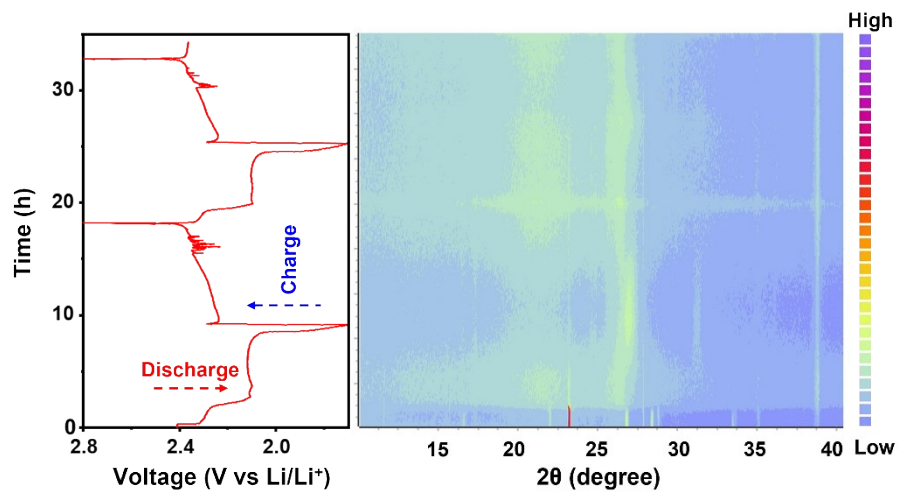

**Fig. S18** *In-situ* XRD contour plot of Co-NCNTs@CNF-0.42-S electrode with the corresponding discharge-charge curves on the left and the diffraction intensity chart on the right.

**Table S2** Comparison of electrochemical performances of Li/S cells with Co-NCNTs@CNF-0.42-S and results from references.

| Samples                                                | S areal loading<br>mg cm <sup>-2</sup> | Cycle number | Reversible capacity<br>mA h cm <sup>-2</sup> | Refs.     |
|--------------------------------------------------------|----------------------------------------|--------------|----------------------------------------------|-----------|
| Co-NCNTs@CNF-0.42-S                                    | 6.5                                    | 100 (0.2 C)  | 5.14                                         | This work |
| OVs-TiO <sub>2</sub> @PP separator                     | 3.6                                    | 100 (0.2 C)  | 4.50                                         | [1]       |
| FeP/rGO/CNTs                                           | 3.5                                    | 200 (1 C)    | 1.40                                         | [2]       |
| rGO@WO <sub>3</sub>                                    | 3.7                                    | 200 (1 C)    | 1.61                                         | [3]       |
| MoO <sub>2</sub> -Mo <sub>2</sub> N interlayer         | 4.0                                    | 100 (0.2 C)  | 2.36                                         | [4]       |
| C <sub>2</sub> N@NbSe <sub>2</sub> /S                  | 5.6                                    | 80 (0.2 C)   | 3.70                                         | [5]       |
| MTQ@3DG/S                                              | 4.9                                    | 100 (0.1 C)  | 4.70                                         | [6]       |
| SAZ-AF separator                                       | 4.0                                    | 100 (2 C)    | 2.30                                         | [7]       |
| In <sub>2</sub> O <sub>3</sub> -G-CNT/S                | 5.9                                    | 200 (0.5 C)  | 3.90                                         | [8]       |
| NiMoO <sub>4</sub> @NSCC/S                             | 5.0                                    | 100 (0.2 C)  | 2.80                                         | [9]       |
| Ni-Co-P@C//PP                                          | 4.5                                    | 80 (0.2 C)   | 3.60                                         | [10]      |
| w/o DPDSe                                              | 5.0                                    | 55 (0.1 C)   | 3.75                                         | [11]      |
| Li <sub>2</sub> S <sub>6</sub> /ZnS <sub>1-x</sub> -CC | 5.0                                    | 100 (0.1 C)  | 3.25                                         | [12]      |
| CoSA-N-C@S                                             | 4.9                                    | 120 (0.2 C)  | 4.20                                         | [13]      |
| S/Fe <sub>3-x</sub> C@C-500                            | 3.0                                    | 50 (0.2 C)   | 3.00                                         | [14]      |
| S@Co/SA-Zn@N-C/CNTs                                    | 5.1                                    | 100 (0.2 C)  | 4.50                                         | [15]      |

## References

- [1] Z. Li, C. Zhou, J. Hua, X. Hong, C. Sun, H.-W. Li, X. Xu and L. Mai, *Adv. Mater.*, 2020, **32**, 1907444.
- [2] S. Huang, Y. V. Lim, X. Zhang, Y. Wang, Y. Zheng, D. Kong, M. Ding, S. A. Yang and H. Y. Yang, *Nano Energy*, 2018, **51**, 340-348.
- [3] L. Ni, S. Duan, H. Zhang, J. Gu, G. Zhao, Z. Lv, G. Yang, Z. Ma, Y. Liu, Y. Fu, Z. Wu, J. Xie, M. Chen and G. Diao, *Carbon*, 2021, **182**, 335-347.
- [4] J.-L. Yang, S.-X. Zhao, Y.-M. Lu, X.-T. Zeng, W. Lv and G.-Z. Cao, *Nano Energy*, 2020, **68**, 104356.
- [5] D. Yang, Z. Liang, C. Zhang, J. J. Biendicho, M. Botifoll, M. C. Spadaro, Q. Chen, M. Li, A. Ramon, A. O. Moghaddam, J. Llorca, J. Wang, J. R. Morante, J. Arbiol, S.-L. Chou and A. Cabot, *Adv. Energy Mater.*, 2021, **11**, 2101250.
- [6] B. Yu, A. Huang, K. Srinivas, X. Zhang, F. Ma, X. Wang, D. Chen, B. Wang, W. Zhang, Z. Wang, J. He and

- Y. Chen, *ACS Nano*, 2021, **15**, 13279-13288.
- [7] C.-L. Song, Z.-H. Li, L.-Y. Ma, M.-Z. Li, S. Huang, X.-J. Hong, Y.-P. Cai and Y.-Q. Lan, *ACS Nano*, 2021, **15**, 13436-13443.
- [8] W. Hua, H. Li, C. Pei, J. Xia, Y. Sun, C. Zhang, W. Lv, Y. Tao, Y. Jiao, B. Zhang, S.-Z. Qiao, Y. Wan and Q.-H. Yang, *Adv. Mater.*, 2021, **33**, 2101006.
- [9] T. Sun, X. Zhao, B. Li, H. Shu, L. Luo, W. Xia, M. Chen, P. Zeng, X. Yang, P. Gao, Y. Pei and X. Wang, *Adv. Funct. Mater.*, 2021, **31**, 2101285.
- [10] Z. Wu, S. Chen, L. Wang, Q. Deng, Z. Zeng, J. Wang and S. Deng, *Energy Stor. Mater.*, 2021, **38**, 381-388.
- [11] M. Zhao, X. Chen, X.-Y. Li, B.-Q. Li and J.-Q. Huang, *Adv. Mater.*, 2021, **33**, 2007298.
- [12] J. Wang, Y. Zhao, G. Li, D. Luo, J. Liu, Y. Zhang, X. Wang, L. Shui and Z. Chen, *Nano Energy*, 2021, **84**, 105891.
- [13] Y. Li, J. Wu, B. Zhang, W. Wang, G. Zhang, Z. W. Seh, N. Zhang, J. Sun, L. Huang, J. Jiang, J. Zhou and Y. Sun, *Energy Stor. Mater.*, 2020, **30**, 250-259.
- [14] Y. Zhang, G. Li, J. Wang, G. Cui, X. Wei, L. Shui, K. Kempa, G. Zhou, X. Wang and Z. Chen, *Adv. Funct. Mater.*, 2020, **30**, 2001165.
- [15] R. Wang, R. Wu, X. Yan, D. Liu, P. Guo, W. Li and H. Pan, *Adv. Funct. Mater.*, 2022, 2200424.
